# Supplementary material for: Identification of Critical Amino Acid Residues of a Two-Component Sensor Protein for Signal Sensing in Porphyromonas gingivalis Fimbriation via Random Mutant Library Construction
Source: MDPI journal article supplement (doi:10.3390/pathogens13040309), 2024-04-10
Supplement: s1 [file s1]

Figure S2. Construction of expression vectors used in this study.

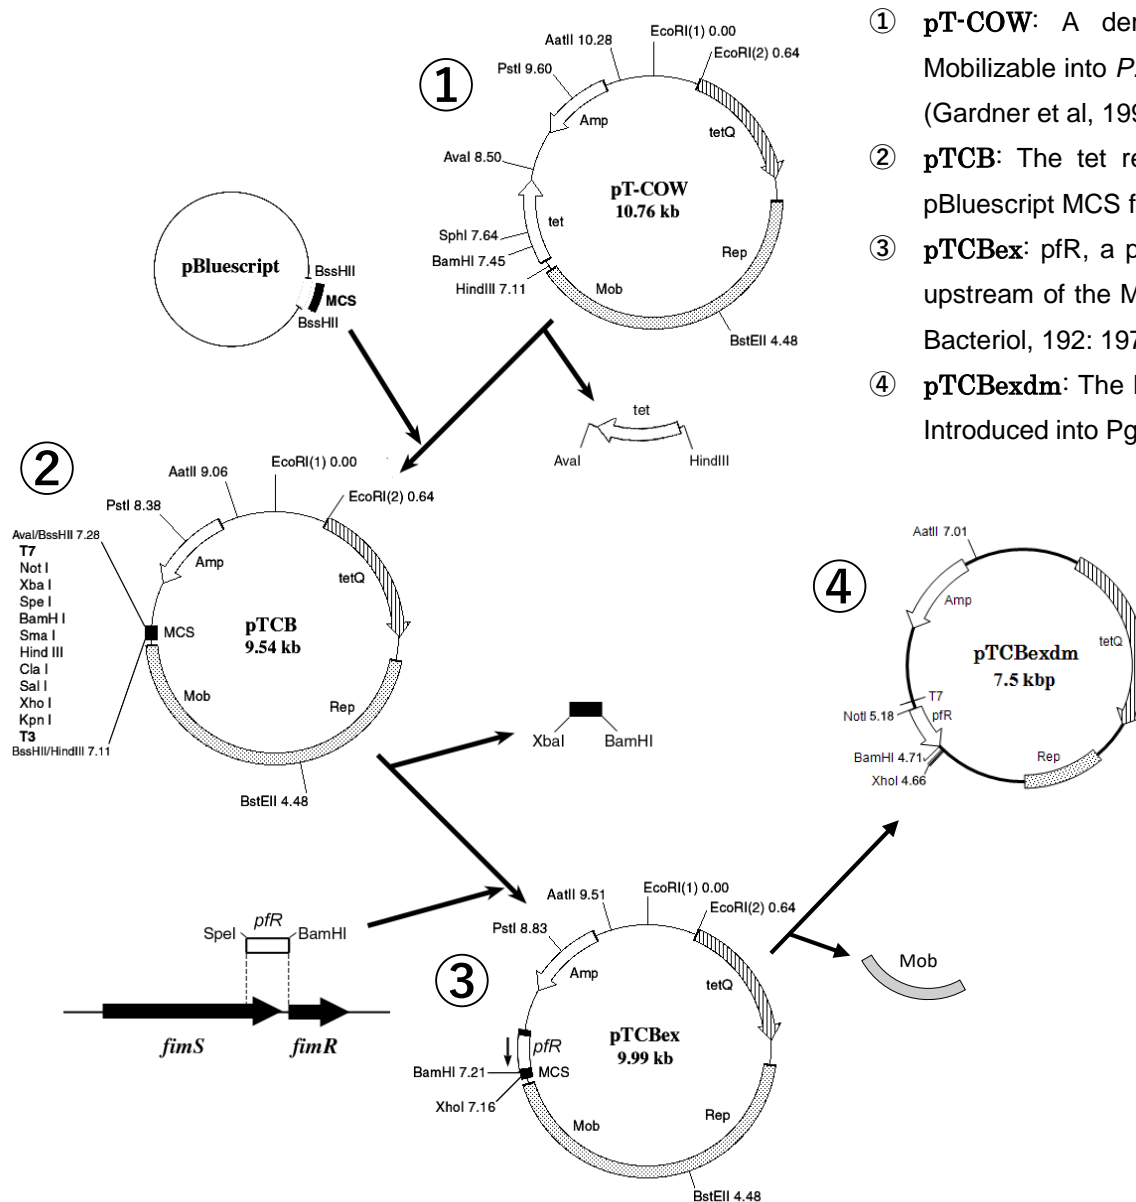

- ① **pT-COW:** A derivative of a plasmid from *Bacteroides*. Mobilizable into *P. gingivalis* from *E. coli* S17-1 by conjugation (Gardner et al, 1996. Appl Environ microbiol, 62: 196-202).
- ② **pTCB:** The *tet* region in pT-COW has been replaced with pBluescript MCS fragment.
- ③ **pTCBex:** *pFR*, a promoter region from *Pg*, has been inserted upstream of the MCS in pTCB (Nishikawa & Duncan, 2010. J Bacteriol, 192: 1975-1987).
- ④ **pTCBexdm:** The *Mob* region has been deleted from pTCBex. Introduced into *Pg* only by electroporation.
