# Supplementary figures and images for: Identification of Critical Amino Acid Residues of a Two-Component Sensor Protein for Signal Sensing in Porphyromonas gingivalis Fimbriation via Random Mutant Library Construction
Source: MDPI journal article supplement (doi:10.3390/pathogens13040309), 2024-04-10

Figure S1: Error-prone PCR: Amplification of megaprimers used in the inverse PCR.

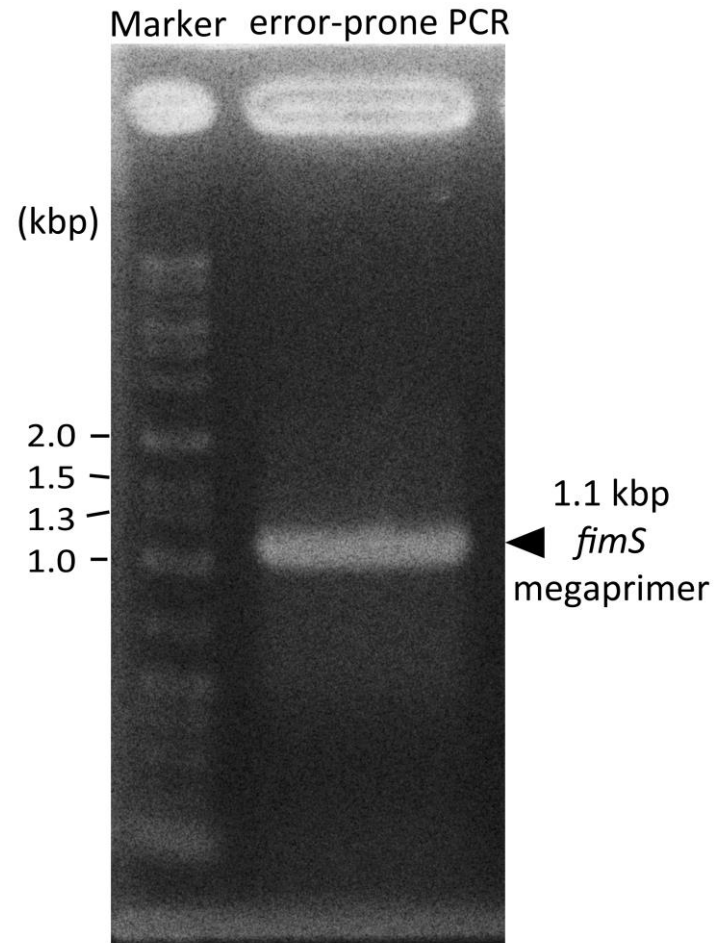

Supplement: s1 [file s1]
